# Supplementary material
Source: Springer Nature journal article supplement (https://www.springermedizin.de/resource/supplementary/13058_2013_3583_MOESM7_ESM.pdf/9703864)
Supplement: MOESM7 [file 9703864]

Supplemental Table 3. 3 weeks on diet qPCR Ingenuity Pathway Analysis

1) Significant Gene List (5):

CCL24  
CCL3  
FGF18  
Hand2  
IL4

2) Top Canonical Pathways

| Ingenuity Canonical Pathways                           | B-H Adjusted p-value | Ratio | Molecules           |
|--------------------------------------------------------|----------------------|-------|---------------------|
| Communication between Innate and Adaptive Immune Cells | 9.11E-03             | 2/109 | CCL3L1/CCL3L3,IL4   |
| Granulocyte Adhesion and Diapedesis                    | 9.33E-03             | 2/175 | CCL3L1/CCL3L3,CCL24 |
| Agranulocyte Adhesion and Diapedesis                   | 9.33E-03             | 2/186 | CCL3L1/CCL3L3,CCL24 |

3) Function Table

| Category                                       | Functions Annotation                       | B-H Adjusted p-value | Molecules                     | Number of Molecules |
|------------------------------------------------|--------------------------------------------|----------------------|-------------------------------|---------------------|
| 3wk qPCR IPA Function Table                    |                                            |                      |                               |                     |
| Behavior                                       | behavior                                   | 6.64E-03             | CCL3L1/CCL3L3,HAND2,IL4       | 3                   |
| Cancer                                         | hyperplasia                                | 5.24E-03             | CCL24,CCL3L1/CCL3L3,IL4       | 3                   |
| Cardiovascular System Development and Function | angiogenesis                               | 1.24E-03             | CCL24,FGF18,HAND2,IL4         | 4                   |
|                                                | development of cardiovascular system       | 7.34E-03             | CCL24,HAND2,IL4               | 3                   |
| Cell Death and Survival                        | necrosis                                   | 9.00E-03             | CCL3L1/CCL3L3,FGF18,HAND2,IL4 | 4                   |
|                                                | cell viability                             | 1.00E-02             | FGF18,HAND2,IL4               | 3                   |
| Cell Signaling*                                | flux of Ca <sup>2+</sup>                   | 1.75E-03             | CCL24,CCL3L1/CCL3L3,IL4       | 3                   |
|                                                | quantity of Ca <sup>2+</sup>               | 3.13E-03             | CCL24,CCL3L1/CCL3L3,IL4       | 3                   |
| Cell-mediated Immune Response                  | cell movement of T lymphocytes             | 1.24E-03             | CCL24,CCL3L1/CCL3L3,IL4       | 3                   |
| Cell-To-Cell Signaling and Interaction*        | recruitment of eosinophils                 | 7.92E-05             | CCL24,CCL3L1/CCL3L3,IL4       | 3                   |
|                                                | communication of cells                     | 2.06E-03             | CCL24,FGF18,IL4               | 3                   |
| Cellular Development*                          | differentiation of connective tissue cells | 6.77E-04             | CCL3L1/CCL3L3,FGF18,HAND2,IL4 | 4                   |
|                                                | proliferation of hematopoietic cells       | 1.61E-03             | CCL24,CCL3L1/CCL3L3,IL4       | 3                   |
| Cellular Function and Maintenance              | flux of Ca <sup>2+</sup>                   | 1.75E-03             | CCL24,CCL3L1/CCL3L3,IL4       | 3                   |
| Cellular Growth and Proliferation*             | formation of osteoclasts                   | 2.44E-04             | CCL3L1/CCL3L3,FGF18,IL4       | 3                   |
|                                                | proliferation of hematopoietic cells       | 1.61E-03             | CCL24,CCL3L1/CCL3L3,IL4       | 3                   |

|                                               |                                          |                 |                                            |          |
|-----------------------------------------------|------------------------------------------|-----------------|--------------------------------------------|----------|
|                                               | colony formation of cells                | 3.30E-03        | CCL24,CCL3L1/CCL3L3,IL4                    | 3        |
|                                               | proliferation of connective tissue cells | 3.99E-03        | CCL24,FGF18,IL4                            | 3        |
|                                               | <b>proliferation of cells</b>            | <b>4.84E-03</b> | <b>CCL24,CCL3L1/CCL3L3,FGF18,HAND2,IL4</b> | <b>5</b> |
| Cellular Movement*                            | <b>chemotaxis of eosinophils</b>         | <b>6.40E-05</b> | <b>CCL24,CCL3L1/CCL3L3,IL4</b>             | <b>3</b> |
|                                               | recruitment of eosinophils               | 7.92E-05        | CCL24,CCL3L1/CCL3L3,IL4                    | 3        |
|                                               | migration of granulocytes                | 6.77E-04        | CCL24,CCL3L1/CCL3L3,IL4                    | 3        |
|                                               | cell movement of dendritic cells         | 6.77E-04        | CCL24,CCL3L1/CCL3L3,IL4                    | 3        |
|                                               | chemotaxis of mononuclear leukocytes     | 9.71E-04        | CCL24,CCL3L1/CCL3L3,IL4                    | 3        |
|                                               | cell movement of T lymphocytes           | 1.24E-03        | CCL24,CCL3L1/CCL3L3,IL4                    | 3        |
|                                               | cell movement of neutrophils             | 1.75E-03        | CCL24,CCL3L1/CCL3L3,IL4                    | 3        |
|                                               | chemotaxis of phagocytes                 | 1.87E-03        | CCL24,CCL3L1/CCL3L3,IL4                    | 3        |
| Connective Tissue Development and Function    | formation of osteoclasts                 | 2.44E-04        | CCL3L1/CCL3L3,FGF18,IL4                    | 3        |
| Connective Tissue Disorders                   | rheumatoid arthritis                     | 4.97E-03        | CCL24,CCL3L1/CCL3L3,IL4                    | 3        |
| Gene Expression                               | activation of DNA endogenous promoter    | 7.54E-03        | CCL3L1/CCL3L3,HAND2,IL4                    | 3        |
| Hematological Disease                         | eosinophilic inflammation                | 1.17E-04        | CCL24,CCL3L1/CCL3L3,IL4                    | 3        |
| Hematological System Development and Function | <b>chemotaxis of eosinophils</b>         | <b>6.40E-05</b> | <b>CCL24,CCL3L1/CCL3L3,IL4</b>             | <b>3</b> |
|                                               | recruitment of eosinophils               | 7.92E-05        | CCL24,CCL3L1/CCL3L3,IL4                    | 3        |
|                                               | migration of granulocytes                | 6.77E-04        | CCL24,CCL3L1/CCL3L3,IL4                    | 3        |
|                                               | cell movement of dendritic cells         | 6.77E-04        | CCL24,CCL3L1/CCL3L3,IL4                    | 3        |
|                                               | chemotaxis of mononuclear leukocytes     | 9.71E-04        | CCL24,CCL3L1/CCL3L3,IL4                    | 3        |
|                                               | cell movement of T lymphocytes           | 1.24E-03        | CCL24,CCL3L1/CCL3L3,IL4                    | 3        |
|                                               | accumulation of leukocytes               | 1.61E-03        | CCL24,CCL3L1/CCL3L3,IL4                    | 3        |
|                                               | proliferation of hematopoietic cells     | 1.61E-03        | CCL24,CCL3L1/CCL3L3,IL4                    | 3        |
|                                               | cell movement of neutrophils             | 1.75E-03        | CCL24,CCL3L1/CCL3L3,IL4                    | 3        |
|                                               | chemotaxis of phagocytes                 | 1.87E-03        | CCL24,CCL3L1/CCL3L3,IL4                    | 3        |
|                                               | quantity of granulocytes                 | 1.98E-03        | CCL24,CCL3L1/CCL3L3,IL4                    | 3        |

|                                                       |                                      |                           |                                |                         |
|-------------------------------------------------------|--------------------------------------|---------------------------|--------------------------------|-------------------------|
| Hematopoiesis                                         | proliferation of hematopoietic cells | 1.61E-03                  | CCL24,CCL3L1/CCL3L3,IL4        | 3                       |
| Hypersensitivity Response                             | <b>chemotaxis of eosinophils</b>     | <b>6.40E-05</b>           | <b>CCL24,CCL3L1/CCL3L3,IL4</b> | <b>3</b>                |
|                                                       | recruitment of eosinophils           | 7.92E-05                  | CCL24,CCL3L1/CCL3L3,IL4        | 3                       |
| Immune Cell Trafficking                               | <b>chemotaxis of eosinophils</b>     | <b>6.40E-05</b>           | <b>CCL24,CCL3L1/CCL3L3,IL4</b> | <b>3</b>                |
|                                                       | recruitment of eosinophils           | 7.92E-05                  | CCL24,CCL3L1/CCL3L3,IL4        | 3                       |
|                                                       | migration of granulocytes            | 6.77E-04                  | CCL24,CCL3L1/CCL3L3,IL4        | 3                       |
|                                                       | cell movement of dendritic cells     | 6.77E-04                  | CCL24,CCL3L1/CCL3L3,IL4        | 3                       |
|                                                       | chemotaxis of mononuclear leukocytes | 9.71E-04                  | CCL24,CCL3L1/CCL3L3,IL4        | 3                       |
|                                                       | cell movement of T lymphocytes       | 1.24E-03                  | CCL24,CCL3L1/CCL3L3,IL4        | 3                       |
|                                                       | accumulation of leukocytes           | 1.61E-03                  | CCL24,CCL3L1/CCL3L3,IL4        | 3                       |
|                                                       | cell movement of neutrophils         | 1.75E-03                  | CCL24,CCL3L1/CCL3L3,IL4        | 3                       |
|                                                       | chemotaxis of phagocytes             | 1.87E-03                  | CCL24,CCL3L1/CCL3L3,IL4        | 3                       |
|                                                       | Immunological Disease                | eosinophilic inflammation | 1.17E-04                       | CCL24,CCL3L1/CCL3L3,IL4 |
| rheumatoid arthritis                                  |                                      | 4.97E-03                  | CCL24,CCL3L1/CCL3L3,IL4        | 3                       |
| Inflammatory Disease                                  | eosinophilic inflammation            | 1.17E-04                  | CCL24,CCL3L1/CCL3L3,IL4        | 3                       |
|                                                       | rheumatoid arthritis                 | 4.97E-03                  | CCL24,CCL3L1/CCL3L3,IL4        | 3                       |
| Inflammatory Response                                 | <b>chemotaxis of eosinophils</b>     | <b>6.40E-05</b>           | <b>CCL24,CCL3L1/CCL3L3,IL4</b> | <b>3</b>                |
|                                                       | cell movement of dendritic cells     | 6.77E-04                  | CCL24,CCL3L1/CCL3L3,IL4        | 3                       |
|                                                       | chemotaxis of mononuclear leukocytes | 9.71E-04                  | CCL24,CCL3L1/CCL3L3,IL4        | 3                       |
|                                                       | accumulation of leukocytes           | 1.61E-03                  | CCL24,CCL3L1/CCL3L3,IL4        | 3                       |
|                                                       | cell movement of neutrophils         | 1.75E-03                  | CCL24,CCL3L1/CCL3L3,IL4        | 3                       |
|                                                       | chemotaxis of phagocytes             | 1.87E-03                  | CCL24,CCL3L1/CCL3L3,IL4        | 3                       |
|                                                       | Molecular Transport                  | flux of Ca <sup>2+</sup>  | 1.75E-03                       | CCL24,CCL3L1/CCL3L3,IL4 |
| quantity of Ca <sup>2+</sup>                          |                                      | 3.13E-03                  | CCL24,CCL3L1/CCL3L3,IL4        | 3                       |
| Skeletal and Muscular Disorders                       | rheumatoid arthritis                 | 4.97E-03                  | CCL24,CCL3L1/CCL3L3,IL4        | 3                       |
| Skeletal and Muscular System Development and Function | formation of osteoclasts             | 2.44E-04                  | CCL3L1/CCL3L3,FGF18,IL4        | 3                       |
| Tissue Development                                    | accumulation of leukocytes           | 1.61E-03                  | CCL24,CCL3L1/CCL3L3,IL4        | 3                       |
|                                                       | development of                       | 1.75E-03                  | FGF18,HAND2,IL4                | 3                       |

| connective tissue   |                              |          |                               |   |
|---------------------|------------------------------|----------|-------------------------------|---|
| Tissue Morphology   | quantity of granulocytes     | 1.98E-03 | CCL24,CCL3L1/CCL3L3,IL4       | 3 |
|                     | quantity of cells            | 4.84E-03 | CCL24,CCL3L1/CCL3L3,FGF18,IL4 | 4 |
| Vitamin and Mineral | flux of Ca <sup>2+</sup>     | 1.75E-03 | CCL24,CCL3L1/CCL3L3,IL4       | 3 |
| Metabolism          | quantity of Ca <sup>2+</sup> | 3.13E-03 | CCL24,CCL3L1/CCL3L3,IL4       | 3 |

\*IPA Top Molecular and Cellular Functions
